# Supplementary material for: Radiation-induced lung injury after breast cancer treatment: incidence in the CANTO-RT cohort and associated clinical and dosimetric risk factors
Source: Front Oncol. 2023 Jun 29;13:1199043. doi: 10.3389/fonc.2023.1199043 (PMC10342531; doi:10.3389/fonc.2023.1199043)
Supplement: Supplementary file 7 [file Table_7.docx]

**Table S7: Contingency tables**

|  | V20>20% | V20≤20% |
| --- | --- | --- |
| No RILI | 458 | 1069 |
| RILI | 21 | 17 |

|  | V20>29% | V20≤29% |
| --- | --- | --- |
| No RILI | 149 | 1378 |
| RILI | 5 | 33 |

|  | V30>10% | V30≤10% |
| --- | --- | --- |
| No RILI | 705 | 822 |
| RILI | 29 | 9 |

| |  | V30>20% | V30≤20% | | --- | --- | --- | | No RILI | 188 | 1339 | | RILI | 10 | 28 |  |  | Dmean>15Gy | Dmean≤15Gy | | --- | --- | --- | | No RILI | 121 | 1406 | | RILI | 9 | 29 |  |  | Dmean>10Gy | Dmean≤10Gy | | --- | --- | --- | | No RILI | 520 | 1007 | | RILI | 24 | 14 | |
| --- | --- | --- | --- | --- | --- | --- | --- | --- | --- | --- | --- | --- | --- | --- | --- | --- | --- | --- | --- | --- | --- | --- | --- | --- | --- | --- | --- |
|  |
|  |
